# Supplementary material for: 17O solid-state NMR study on exposed facets of ZnO nanorods with different aspect ratios
Source: Royal Society of Chemistry journal article supplement (doi:10.1039/d4cp00035h), 2024-01-01
Supplement: d4cp00035h1.pdf [file d4cp00035h1.pdf]

**Electronic Supplementary Information**

for

**$^{17}\text{O}$  solid-state NMR study on exposed facets of ZnO nanorods with different aspect ratio**

Benteng Song,<sup>\*ac</sup> Yuhong Li,<sup>b</sup> Yunhua Sun,<sup>c</sup> Luming Peng,<sup>c</sup> Ling-Hai Xie<sup>\*a</sup>

<sup>a</sup> Key Laboratory for Organic Electronics and Information Displays (KLOEID) & Institute of Advanced Materials (IAM), Jiangsu National Synergetic Innovation Center for Advanced Materials (SICAM), Nanjing University of Posts & Telecommunications, 9 Wenyuan Road, Nanjing 210023, China

<sup>b</sup> Suzhou Key Laboratory of Functional Ceramic Materials, School of Materials Engineering, Changshu Institute of Technology, Changshu 215500, Jiangsu Province, China

<sup>c</sup> Key Laboratory of Mesoscopic Chemistry of Ministry of Education and Collaborative Innovation Center of Chemistry for Life Sciences, School of Chemistry and Chemical Engineering, Nanjing University, Nanjing 210023, China

\* Correspondence: 1345385561@qq.com; iamlhxie@njupt.edu.cn

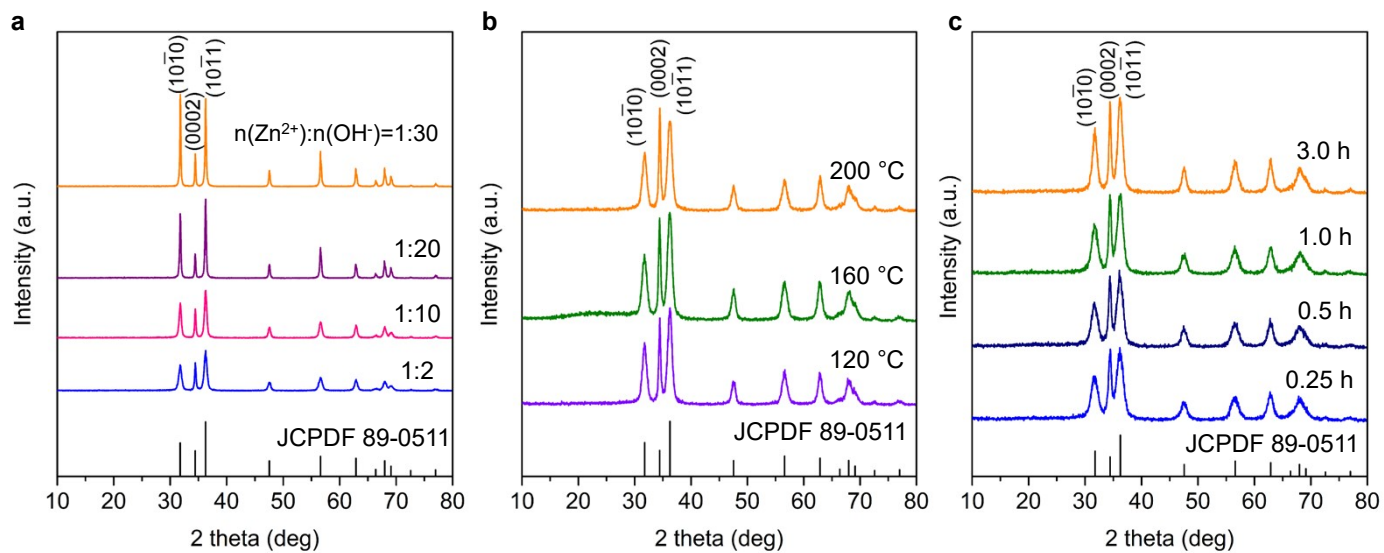

**Fig. S1** XRD patterns of ZnO nanorods prepared with different molar ratio of  $Zn^{2+}/OH^-$  (a), hydrothermal temperature (b), and hydrothermal time (c).

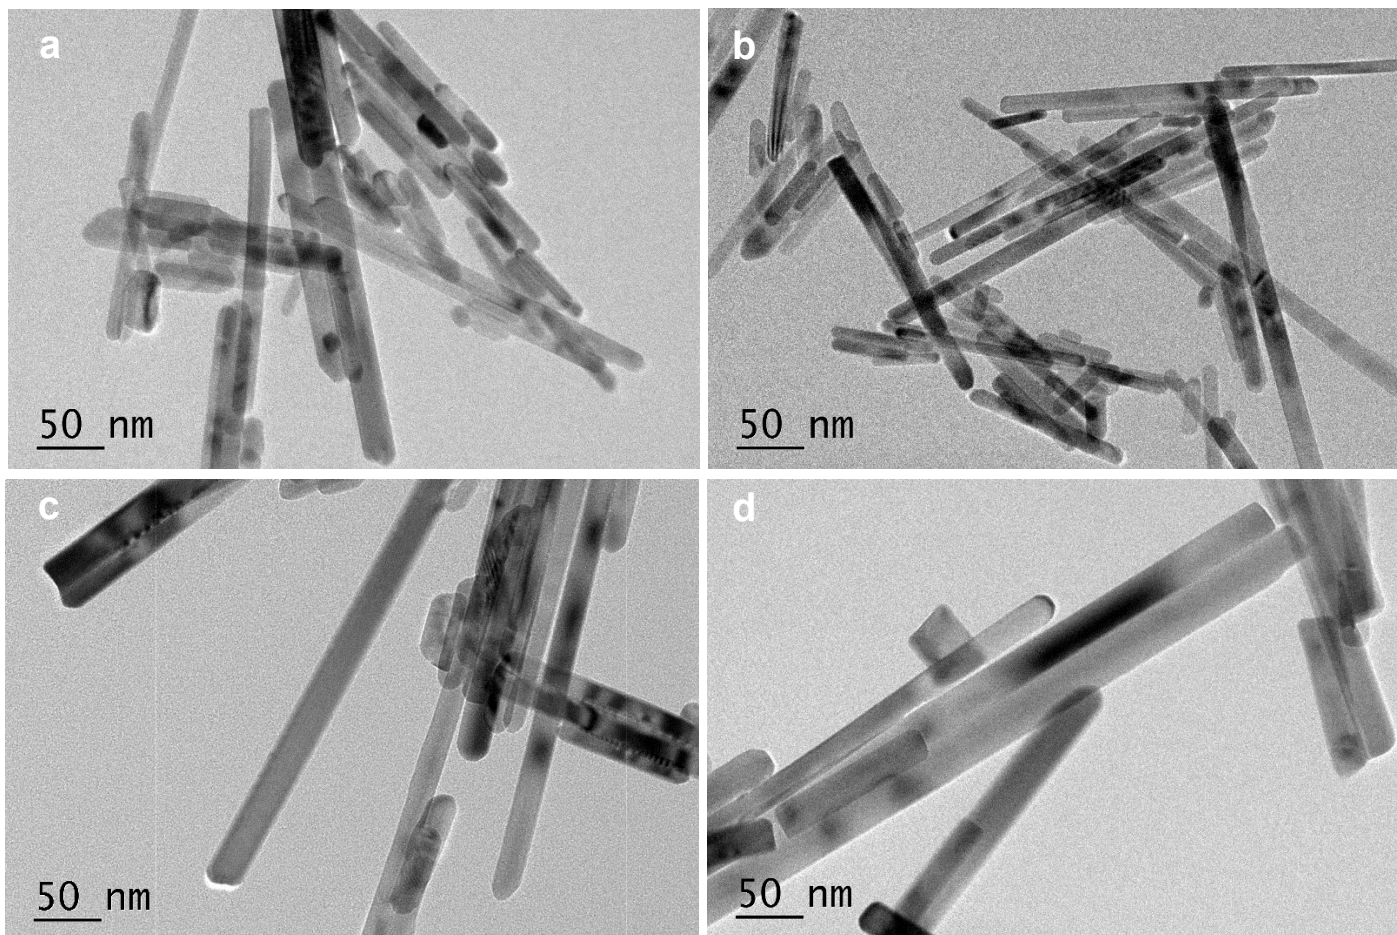

**Fig. S2** TEM images of ZnO nanorods with various molar ratios of  $\text{Zn}^{2+}/\text{OH}^-$  (a-d: 1:2; 1:10; 1:20; 1:30). Data analysis on the length-to-diameter ratio can be found in Table S2.

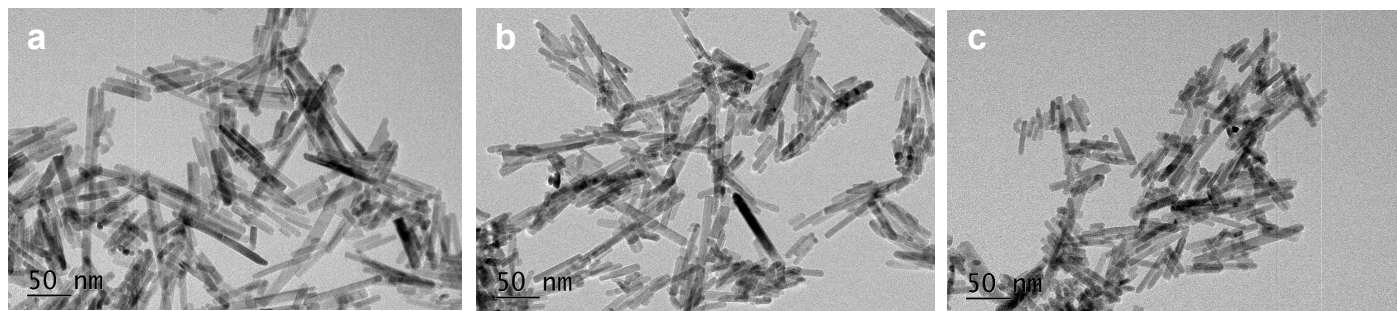

**Fig. S3** TEM images of ZnO nanorods with different hydrothermal synthesis temperatures (a: 120 °C, b: 160 °C, and c: 200 °C). Data analysis on the length-to-diameter ratio can be found in Table S2.

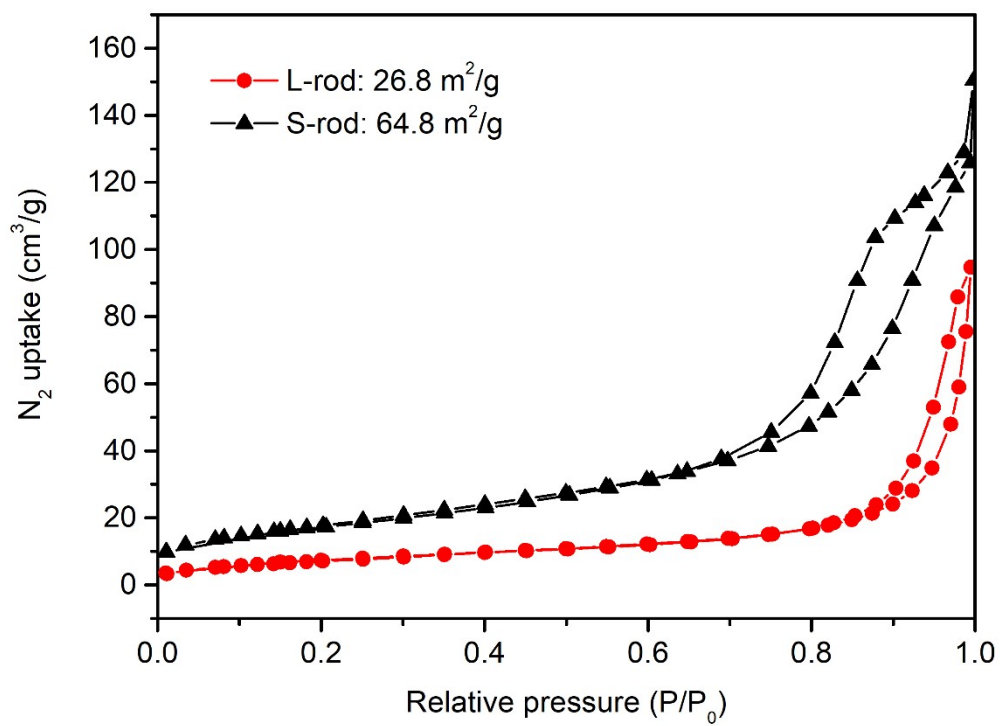

**Fig. S4** N<sub>2</sub> adsorption and desorption isotherms of L-rod and S-rod samples.

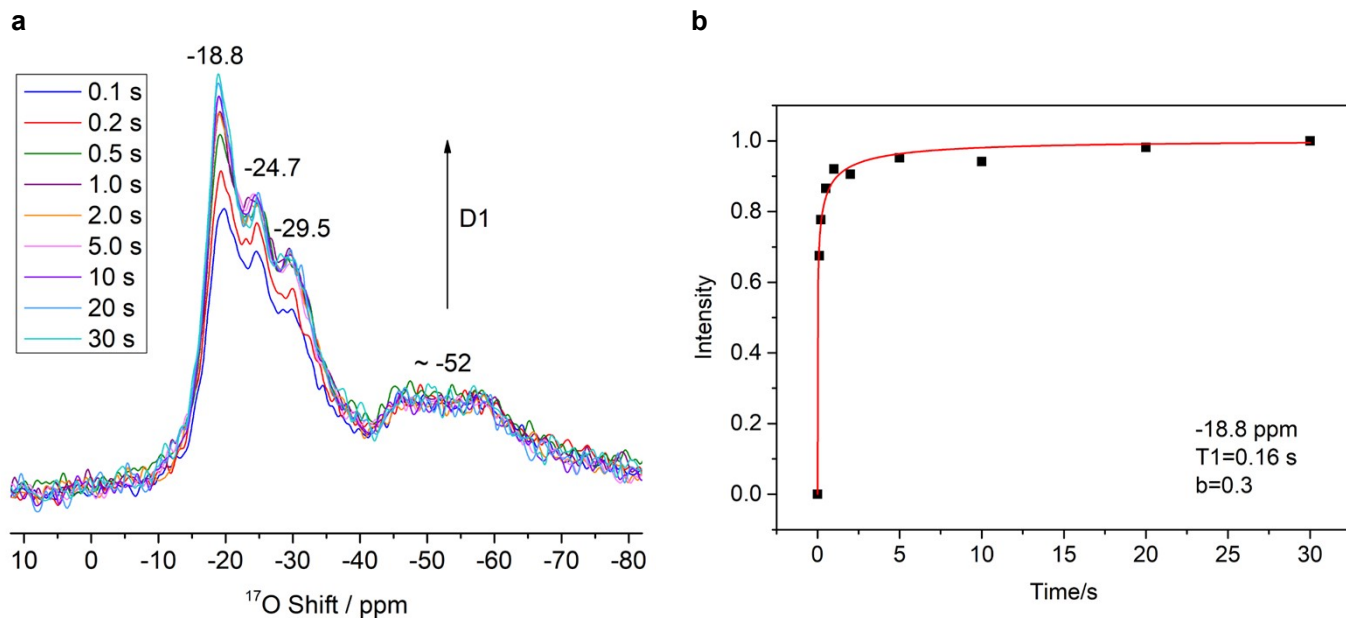

**Fig. S5**  $^{17}\text{O}$  MAS NMR spectra of L-rod. (a)  $^{17}\text{O}$  MAS NMR spectra of L-rod labeled with  $\text{H}_2^{17}\text{O}$ , as a function of the recycle delays from 0.1 to 30 s. The spectra were obtained at 9.4 T under a MAS frequency of 14 kHz.

(b)  $T_1$  analytical fit using a stretch exponential function of the type  $I(t) = I_0(1 - e^{-\frac{t}{T_1}^b})$ , where  $I(t)$  and  $I_0$  are the signal intensities at recycle delay  $t$  and at equilibrium, respectively.

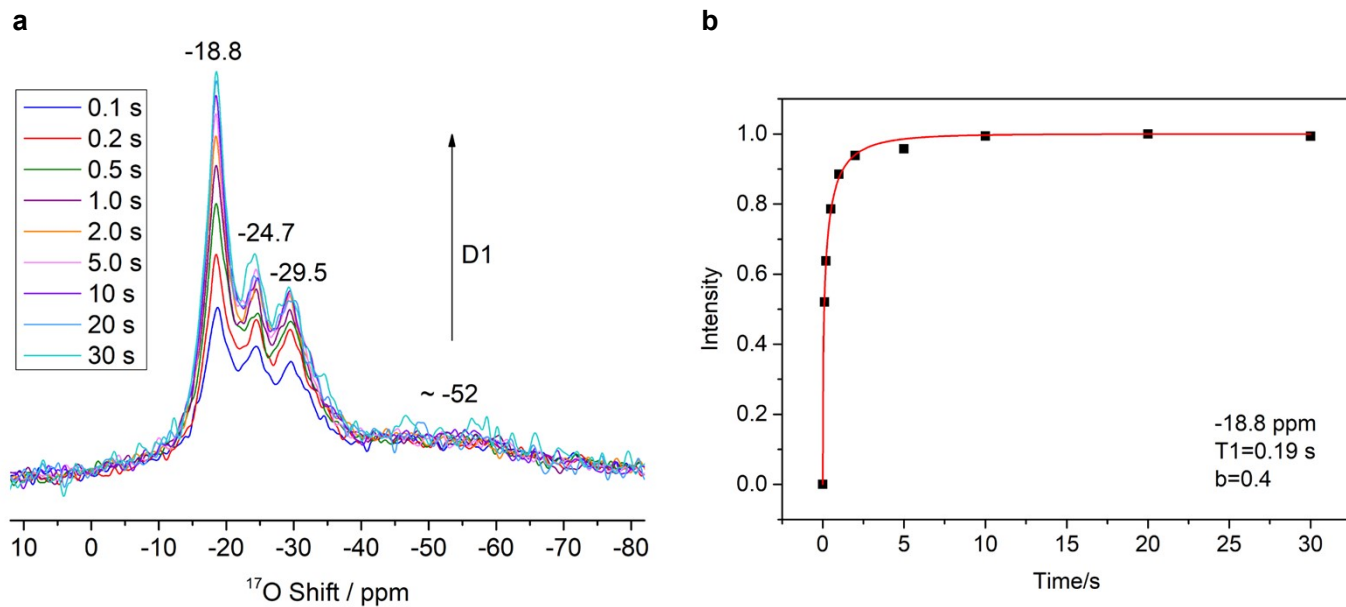

**Fig. S6**  $^{17}\text{O}$  MAS NMR spectra of S-rod. (a)  $^{17}\text{O}$  MAS NMR spectra of S-rod labeled with  $\text{H}_2^{17}\text{O}$ , as a function of the recycle delays from 0.1 to 30 s. The spectra were obtained at 9.4 T under a MAS frequency of 14 kHz.

(b)  $T_1$  analytical fit using a stretch exponential function of the type  $I(t) = I_0(1 - e^{-\frac{t}{T_1}^b})$ , where  $I(t)$  and  $I_0$  are the signal intensities at recycle delay  $t$  and at equilibrium, respectively.

**Table S1** Data analysis on the length-to-diameter ratio of ZnO nanorods with different hydrothermal synthesis time.

| <b>Hydrothermal time/h</b> | <b>Diameter of (0002) facet/nm</b> | <b>Length/nm</b> | <b>Length/Diameter</b> | <b>Ratio of (100) facet/%</b> |
|----------------------------|------------------------------------|------------------|------------------------|-------------------------------|
| 0.25                       | 6 ~ 8                              | 12 ~ 20          | 2.3                    | 84.0                          |
| 0.5                        | 6 ~ 9                              | 16 ~ 24          | 2.7                    | 86.0                          |
| 1.0                        | 6 ~ 10                             | 19 ~ 42          | 3.8                    | 89.8                          |
| 3.0                        | 6 ~ 11                             | 32 ~ 86          | 6.9                    | 94.0                          |



**Table S2** Data analysis on the length-to-diameter ratio of ZnO nanorods prepared as a function of the molar ratio of  $\text{Zn}^{2+}/\text{OH}^-$  and hydrothermal temperature.

| <b>n(<math>\text{Zn}^{2+}</math>):n(<math>\text{OH}^-</math>)</b> | <b>Diameter of (0002) facet/nm</b> | <b>Length/nm</b> | <b>Length/Diameter</b> |
|-------------------------------------------------------------------|------------------------------------|------------------|------------------------|
| 1:2                                                               | 10 ~ 20                            | 75 ~ 225         | 10                     |
| 1:10                                                              | 10 ~ 23                            | 100 ~ 250        | 10.7                   |
| 1:20                                                              | 25 ~ 30                            | 350 ~ 400        | 13                     |
| 1:30                                                              | 30 ~ 35                            | 440 ~ 500        | 14                     |
| <b>Hydrothermal temperature/<math>^{\circ}\text{C}</math></b>     | <b>Diameter of (0002) facet/nm</b> | <b>Length/nm</b> | <b>Length/Diameter</b> |
| 120                                                               | 7 ~ 12                             | 49 ~ 157         | 11                     |
| 160                                                               | 7 ~ 9                              | 47 ~ 98          | 9                      |
| 200                                                               | 6 ~ 8                              | 38 ~ 69          | 7                      |

**Table S3** NMR parameters including isotropic chemical shifts ( $\delta_{\text{iso}}$ ) and quadrupolar parameters ( $C_Q$  and  $\eta$ ), used for simulating the  $^{17}\text{O}$  NMR spectra in Fig. 4c, as well as simulated  $\delta_{\text{CGs}}$  for these species at 9.4 T.<sup>1</sup>

| $\delta_{\text{iso}}$<br>/ppm | $C_Q$<br>/MHz   | $\eta$        | $\delta_{\text{CG/ppm}}$<br>(9.4 T) | Assignment                     |
|-------------------------------|-----------------|---------------|-------------------------------------|--------------------------------|
| $-15.8 \pm 0.4$               | $1.19 \pm 0.02$ | $0.5 \pm 0.5$ | -18.9                               | Surface $\text{O}_{3c}$ (M2)   |
| $-18.8 \pm 0.2$               | $0.10 \pm 0.05$ | $0.5 \pm 0.5$ | -18.8                               | Subsurface $\text{O}_{4c}$     |
| $-24.5 \pm 0.15$              | $0.40 \pm 0.05$ | $0.5 \pm 0.5$ | -24.8                               | Surface $\text{O}_{4c}$        |
| $-29.4 \pm 0.2$               | $0.30 \pm 0.05$ | $0.5 \pm 0.5$ | -29.6                               | Surface $\text{O}_{4c}$        |
| $-27.0 \pm 1.5$               | $1.75 \pm 0.2$  | $0.5 \pm 0.5$ | -33.7                               | Surface $\text{O}_{3c}$ (M1D1) |
| $-39 \pm 1.5$                 | $2.50 \pm 0.15$ | $0.1 \pm 0.1$ | -52.0                               | OH                             |

## References

- 1 B. T. Song, Y. H. Li, X.-P. Wu, F. Wang, M. Lin, Y. H. Sun, A.-P. Jia, X. Ning, L. Jin, X. K. Ke, Z. W. Yu, G. Yang, W. H. Hou, W. P. Ding, X.-Q. Gong and L. M. Peng, *J. Am. Chem. Soc.*, 2022, **144**, 23340–23351.
